# Supplementary material
Source: Research Square preprint supplement (doi:10.21203/rs.3.rs-9607536/v1)
Supplement: Supplementary file 1 [file 876a47cbc5da42c628d4da99.docx]

**Supplementary Material**

**Frequency and determinants of belief and lack of belief in gender identity in representative UK and US samples**

**Appendix 1 – Materials**

**Participant Introduction**

Thank you for agreeing to take part in a study of how facts or details about you are related to the identities you might or might not have. The facts or details we will ask you about are quite straightforward, such as how far you now live from your childhood home. For each biographical fact or detail we will then ask you about possible identities you might or might not have, and, for each identity you do have, we will ask you to rate how important it is to you.

When we ask you to rate how important an identity is to you, you might think about:

How much support you have for that identity. So, if being a football or netball coach is an identity for you, do you get support from others in that role?

How much commitment you have to the identity. So, if being a chess player is an identity to you, how often do you do the activity, and what would you sacrifice (e.g., money, time) to do the activity?

How much reward you get from the identity. So, if you love one particular type of music, and see that as an identity for you, how much reward do you get from it? Reward can mean personal satisfaction or you can get rewards from other people, whether through money or from praise or status.

You might also think about identity as your view of yourself, or how you think of yourself, and an essential ingredient of who you are.

You might also think about what your interests are, both in terms of what interests you, and in terms of what is in your interest, that is, what identity is an advantage or is beneficial to you.

[Before answering the free-form and specific question identity items participants were required to answer correctly three knowledge/attention multiple choice questions. The three response options for each (with the correct option here underlined), presented at the start of the study were:]

Q. An identity is:

A. Something other people tell you to believe about yourself

A. How you think of yourself, an essential ingredient of who you are

A. Like a mood or an emotion, which can change many times per day

Q. Next, comparing yourself to other people:

A. Some people might have an identity that you don't have for yourself

A. Everyone has the same list of identities

A. I don't know what identities I have nor what identities anyone has

Q. Next, when you have a particular identity, its importance to you is a result of:

A. Your mood and feelings when you are asked about the identity

A. How important other people tell you it is

A. The support, commitment and reward you have for the identity

**Questionnaire**

***Question Set 1:***

For a first question, please answer, how far do you live from your childhood home, or main or most important childhood home?

Then, do **you** have a **hometown identity**, that is, an identity about being from your childhood city or town? Yes / No

If yes, please state here what your hometown identity is.

If you answered yes, please rate how important this identity is to you.

[Scale] 1 = Not at all important; 2 = Slightly important; 3 = Moderately important; 4 = Very important; 5 = Extremely important.

***Question Set 2:***

What is your biological or legal sex? Male / Female

Do **you** have a **gender identity**? Yes / No

Please state here what your gender identity is.

Please rate how important this identity is to you.

[Scale] 1 = Not at all important; 2 = Slightly important; 3 = Moderately important; 4 = Very important; 5 = Extremely important.

[The sex and gender questions are placed second in the list for condition 1 and placed last in the list for condition 2.]

***Question Set 3:***

What is your employment / usual employment? (Please state student if you are a student and state what you study.)

Do **you** have an **identity based on your employment or of being a student**? Yes / No

Please state here what your employment or student identity is.

Please rate how important this identity is to you.

***Question Set 4:***

What is your nationality or usual country of residence?

Do **you** have a **national identity**? Yes / No

Please state here what your national identity is.

Please rate how important this identity is to you.

***Question Set 5:***

Please rate how extraverted or introverted you are.

1 = extremely or very introverted

2 = quite introverted

3 = neither introverted nor extraverted, or very much depends on the situation

4 = quite extraverted

5 = extremely or very extraverted

Do **you** have an **identity based on your level of extraversion or introversion**? (e.g., party animal, recluse.) Yes / No

Please state here what this identity is.

Please rate how important this identity is to you.

***Question Set 6:***

What is your age?

Do **you** have an **identity based on your age**? (e.g., elderly and wise, middle aged, young influencer) Yes / No

Please state here what your age identity is.

Please rate how important this identity is to you.

***Question Set 7:***

Do you have an astrological star sign? Yes / No

If yes, do **you** have an **identity based on your star sign**? (e.g., a Sagittarian, an Aquarian)? Yes / No

Please state here what your star sign identity is.

Please rate how important this identity is to you.

***Question Set 8:***

Do you believe in or follow a religion? Yes / No

If yes, do **you** have a **religious identity**? Yes / No

Please rate how important this identity is to you.

***Question Set 9:***

Are you particularly interested in any musician, musical group, composer, or type or genre of music? (This can include yourself being the musician.) Yes / No

If yes, do **you** have a **musical identity**, based on this musician, musical group, composer, or type or genre of music? Yes / No

Please state what your musical identity is.

Please rate how important this identity is to you.

***Question Set 10:***

Are you interested in any particular sport or sports person or sport competition? Yes / No

If yes, do **you** have a **sports identity**, based on this sport or sports person or sport competition?

Yes / No

Please state here what your sports identity is.

Please rate how important this identity is to you.

***Question Set 11:***

Do you have a non-work role or responsibility or activity that is very important to you? Yes / No

If yes, do **you** have an **identity based on this non-work role or responsibility or activity**? Yes / No

Please state here what this identity is.

Please rate how important this identity is to you.

***Question Set 12:***

Is there an educational place from any part of your life that is very important to you? Yes / No

If yes, do **you** have an **identity based on this educational place**? Yes / No

Please state here what your educational place identity is.

Please rate how important this identity is to you.

***Question Set 13:***

How interested are you in politics? [rating scale 1 = not at all interested to

5 = extremely interested]

Do **you** have a **political identity**, based on your interest in politics? Yes / No

[we do not ask participants what their political identity is, if they have one]

Please rate how important this identity is to you.

***Question Set 14:***

How many books do you read per year?

Do **you** have an **identity** based on any type or theme of **book** or based on any particular **author**? Yes / No

Please state here what this identity is.

Please rate how important this identity is to you.

***Question Set 15:***

How many films or TV series do you watch per year?

Do **you** have an **identity** based on watching any type of **film** or **TV** series? Yes / No

Please state here what this identity is.

Please rate how important this identity is to you.

[in condition 2 the sex and gender identity question is placed here.]

**Supplementary Table 1**

*Item scores on the 7-item Critical Social Justice Attitudes scale. Responses were made using a scale 1 = “completely disagree” to 5 = “completely agree”.*

| Item | Mean | SD |
| --- | --- | --- |
| CSJA1 - If white people have on average a higher level of income than black people, it is because of racism. | 2.79 | 1.31 |
| CSJA2 - University reading lists should include fewer white or European authors. | 2.52 | 1.17 |
| CSJA3 - Microaggressions* should be challenged often and actively. … | 3.65 | 1.21 |
| CSJA4 - Trans* women who compete with women in sports are not helping women’s rights. … (r) | 3.83 | 1.29 |
| CSJA5- We don’t need to talk more about the color of people’s skin. (r) | 3.28 | 1.49 |
| CSJA6 - A white person cannot understand how a black person feels equally well as another black person. | 3.89 | 1.13 |
| CSJA7 - A member of a privileged group can adopt features or cultural elements of a less privileged group. (r) | 3.36 | 1.13 |
| Scale mean & SD | 2.91 | 0.82 |

**List of Critical Social Justice Attitude items**

CSJA1. If white people have on average a higher level of income than black people, it is because of racism.

CSJA2. University reading lists should include fewer white or European authors.

CSJA3. Microaggressions* should be challenged often and actively. (* = verbal communication or act, which can be seen to reflect negative attitudes towards a minority group, regardless of original intent)

CSJA4. Trans* women who compete with women in sports are not helping women’s rights. (* = born male, identify as female) (reverse scored)

CSJAS5 We don’t need to talk more about the color of people’s skin. (reverse scored)

CSJAS6 A white person cannot understand how a black person feels equally well as another black person.

CSJAS7 A member of a privileged group can adopt features or cultural elements of a less privileged group. (reverse scored)

**Appendix 2 – Participant Demographics and Supplementary Results**

***Political Affiliation and Ethnicity of the Three Studies***

Study 1: White, 82.4%; Asian, 7.6%, Black 3.3%, Mixed 3.3%, Other 3.3%. Political affiliation not measured in study 1.

Study 2: Labour, 47.0%; Conservative, 18.0%; Reform UK, 12.3%; Liberal Democrat, 8.7%; Green, 7.3%; Other/missing, 6.7%.

Study 2: White, 86.0%; Asian, 6.0%, Black 3.3%, Mixed, 3.7%; Other/missing, 1.0%.

Study 3: Republican, 29.9%; Democrat, 29.9%; Independent, 39.9%; Missing, 0.3%.

Study 3: White, 54.5%; Asian, 10.0%; Black, 13.3%; Mixed, 12.0%; Missing, 10.3%.

***Supplementary Results***

**Supplementary Table 2**

*Responses for Males and Females to the Gender Identity Question for UK and US samples*

|  | Do you have a gender identity? | | |
| --- | --- | --- | --- |
| UK | Yes | No | % ‘No’ |
| Malea | 208 | 75 | 26.4% |
| Femalea | 258 | 59 | 18.6% |
| US |  |  |  |
| Male | 103 | 44 | 29.9% |
| Female | 137 | 17 | 11.0% |

*Notes:* a Gender identity question was not responded to by one female and by one male. Females were significantly more likely to assert a gender identity than were males for the UK and US samples, χ2(1) = 5.37, *p* = .021, and χ2(1) = 16.61, *p* < .001, respectively.

**Supplementary Table 3**

*Number and Frequency of Gender Identities Reported by the 706 Participants who Responded ‘Yes’ to the Question ‘Do you have a gender identity?’*

| Gender identity reported | | Frequency | | Percent | |
| --- | --- | --- | --- | --- | --- |
| Male | 231 | | 32.7 | |
| Female | 268 | | 38.0 | |
| Man | 24 | | 3.4 | |
| Woman/girl | 60 | | 8.5 | |
| Non-binary | 6 | | .8 | |
| Queer/gender queer | 2 | | .3 | |
| Transman | 1 | | .1 | |
| Transwoman | 2 | | .3 | |
| Feminine | 4 | | .6 | |
| woman/female | 8 | | 1.1 | |
| female + attributesa | 23 | | 3.3 | |
| male + attributesa | 19 | | 2.7 | |
| woman + attributesa | 12 | | 1.7 | |
| man + attributesa | 9 | | 1.3 | |
| father/son/husband | 5 | | .7 | |
| sexuality-related | 10 | | 1.4 | |
| she/her | 1 | | .1 | |
| Masculine | 2 | | .3 | |
| 'not identity, a fact' | 1 | | .1 | |
| protective, partner, parent, chivalrous | 4 | | .6 | |
| Supporter | 1 | | .1 | |
| Lesbian | 2 | | .3 | |
| non-binary man | 1 | | .1 | |
| present as female | 1 | | .1 | |
| Feminist | 1 | | .1 | |
| Cis | 4 | | .6 | |
| other traits and virtues | 1 | | .1 | |
| male/man | 1 | | .1 | |
| mother/wife | 1 | | .1 | |
| no gender identity stated | 1 | | .1 | |
| Total | 706 | | 100.0 | |

*Note:* a Examples of attributes: non-girlie woman; straight male; cisgender female; she/her/female; woman feminine; Male, supports family; Alpha male.

**Supplementary Table 4**

*Descriptive Statistics for the 15 Questions of Presence / Absence of an Identity: Number of ‘Yes’ Responses to Each Identity Question, Percentage of ‘Yes’ Responses out of 903 Participants, and Mean and SD of Importance Rating for Those who State They Have the Identity*

| Identity type | Identity = yes | Percentage identity = yes | Mean importance rating | SD importance rating |
| --- | --- | --- | --- | --- |
| Hometown | 627 | 69.4 | 3.16 | 1.09 |
| Gender | 706 | 78.2 | 3.94 | 1.10 |
| Employment | 531 | 58.8 | 3.74 | 0.98 |
| National | 732 | 81.1 | 3.47 | 1.10 |
| Extraversion/introversion | 399 | 44.2 | 3.19 | 1.11 |
| Age | 365 | 40.4 | 3.06 | 1.15 |
| Star sign | 284 | 31.5 | 2.49 | 1.13 |
| Religious | 261 | 28.9 | 3.98 | 1.05 |
| Musical | 350 | 38.8 | 3.50 | 1.02 |
| Sports | 303 | 33.6 | 3.59 | 1.00 |
| Non-work role | 520 | 57.6 | 4.30 | 0.88 |
| Educational place | 223 | 24.7 | 3.40 | 1.09 |
| Political | 378 | 41.9 | 3.46 | 0.99 |
| Type of book, or author | 215 | 23.8 | 3.17 | 1.12 |
| Type of film or TV series | 217 | 24.0 | 2.94 | 1.12 |

**Supplementary Table 5**

*Frequencies of number of identities other than gender identity*

| Number of identities | Frequency | % |
| --- | --- | --- |
| 0 | 3 | 0.5 |
| 1 | 12 | 2.0 |
| 2 | 28 | 4.7 |
| 3 | 59 | 9.8 |
| 4 | 75 | 12.5 |
| 5 | 77 | 12.8 |
| 6 | 90 | 15.0 |
| 7 | 76 | 12.6 |
| 8 | 63 | 10.5 |
| 9 | 39 | 6.5 |
| 10 | 34 | 5.7 |
| 11 | 26 | 4.3 |
| 12 | 12 | 2.0 |
| 13 | 3 | 0.5 |
| 14 | 4 | 0.7 |

**Supplementary Table 6**

*UK Political Affiliation and Gender Identity*

|  | | Do you have a gender identity? | | | | Total | |
| --- | --- | --- | --- | --- | --- | --- | --- |
| Yes | | No | |
|  | Conservative | | 45 | | 9 | | 54 | |
| Green | | 19 | | 3 | | 22 | |
| Labour | | 110 | | 30 | | 140 | |
| Liberal Democrats | | 17 | | 9 | | 26 | |
| Reform UKa | | 27 | | 10 | | 37 | |
| Total | | 218 | | 61 | | 279 | |

*Notes:*  a Reform UK is a socially conservative political party. No association between political affiliation and assenting / not assenting to having a gender identity, χ2(4) = 4.79, p = .309.

**Supplementary Table 7**

US Political Affiliation and Gender Identity

|  | | Do you have a gender identity? | | Total |
| --- | --- | --- | --- | --- |
| Yes | No |
|  | Republican | 80 | 10 | 90 |
| Democrat | 69 | 21 | 90 |
| Independent | 91 | 29 | 120 |
| Total | | 240 | 60 | 300 |

*Note:* Significant association between political affiliation and assenting / not assenting to having a gender identity, χ2(2) = 6.37, p = .041.

**Supplementary Table 8**

*UK ethnicity and gender identity*

|  | | Do you have a gender identity? | | Total |
| --- | --- | --- | --- | --- |
| Yes | No |
|  | White | 200 | 57 | 257 |
| Asian | 15 | 3 | 18 |
| Black | 9 | 1 | 10 |
| Mixed | 10 | 1 | 11 |
| Total | | 234 | 62 | 296 |

*Note:* No association between ethnicity and assenting / not assenting to having a gender identity, χ2(3) = 2.09, p = .553.

**Supplementary Table 9**

*US ethnicity and gender identity*

|  | | Do you have a gender identity? | | Total |
| --- | --- | --- | --- | --- |
| Yes | No |
|  | White | 131 | 33 | 164 |
| Asian | 25 | 5 | 30 |
| Black | 35 | 5 | 40 |
| Mixed | 27 | 9 | 36 |
| Total | | 218 | 52 | 270 |

*Note:* No association between ethnicity and assenting / not assenting to having a gender identity, χ2(3) = 2.15, p = .543.
